# Supplementary material for: Osteopontin-induced relapse and progression of autoimmune brain disease through enhanced survival of activated T cells
Source: Springer Nature journal article supplement (doi:10.1038/ni1415), 2006-12-03
Supplement: ni1415-S2.pdf [file ni1415-S2.pdf]

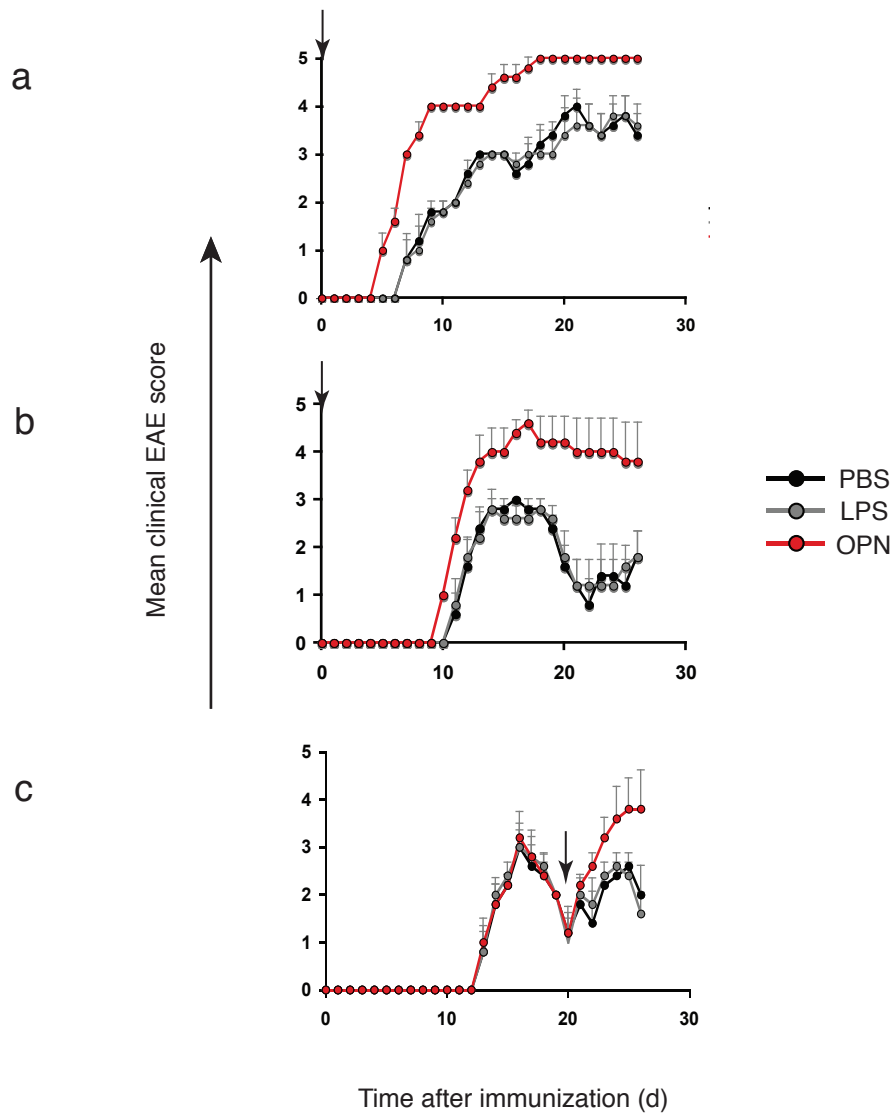

**Supplementary figure 2. Residual LPS in purified OPN does not affect clinical score of EAE.** EAE was induced in 2D2 mice (5 per group) (a), SJL/J (5 per group) (b, c). Mice were treated with rOPN (5 µg) or LPS (0.5 ng) or PBS i.v. daily from day 0 (a and b) or from day 20 (after first remission). Arrows indicate the starting day of treatment. Data represent mean clinical score and s.e.m.
