# Supplementary material for: Osteopontin-induced relapse and progression of autoimmune brain disease through enhanced survival of activated T cells
Source: Springer Nature journal article supplement (doi:10.1038/ni1415), 2006-12-03
Supplement: ni1415-S3.pdf [file ni1415-S3.pdf]

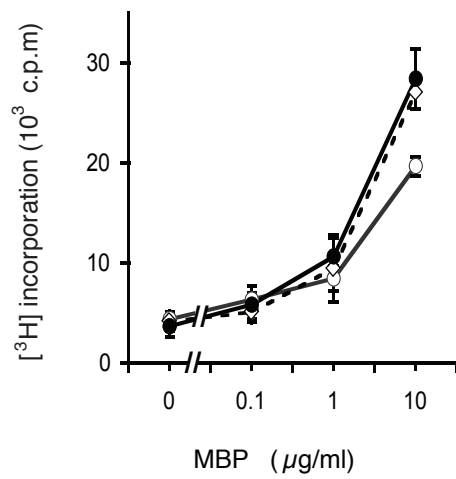

**Supplementary figure 3. Increased T cell proliferation by OPN.** Splenocytes ( $2.5 \times 10^6/\text{ml}$ ) from MBP TCR Transgenic mice were stimulated with a specific peptide Ac1-11 (0-10  $\mu\text{g/ml}$ ) and cultured with 0 (open circle), 0.4 (open diamond) and 4 (closed circle)  $\mu\text{g/ml}$  of soluble recombinant OPN (rOPN).  $[^3\text{H}]$ -thymidine was added to the triplicates ( $n = 3$ , mean  $\pm$  s.e.m.), after 96 h of antigen stimulation; its incorporation was measured after 18 h.
